# Supplementary material for: Patterns of Synonymous Codon Usage on Human Metapneumovirus and Its Influencing Factors
Source: Hindawi journal article supplement (doi:10.1155/2012/460837), 2012-01-01
Supplement: f1 [file 460837.f1.docx]

**Supplemental Table 1 10 AMPV genomes sequences used in this study**

| **SN** | **Genbank accession** | **Source** |
| --- | --- | --- |
| 1 | DQ009484 | Minnesota, USA |
| 2 | AY590688 | Colorado, USA |
| 3 | AY579780 | Colorado, USA |
| 4 | AB548428 | France |
| 5 | AY640317 | United Kingdom |
| 6 | NC007652 | Minnesota, USA |
| 7 | JF424833 | Italy |
| 8 | EF199772 | South Korea |
| 9 | EF199771 | South Korea |
| 10 | FJ977568 | Ohio, USA |

Abbreviation: SN is serial number.
